# Supplementary material for: Ethylene glycol-assisted nanocrystallization of LiFePO4 for a rechargeable lithium-ion battery cathode
Source: Royal Society of Chemistry journal article supplement (doi:10.1039/c2ce06423e), 2012-01-01
Supplement: c2ce06423e.pdf [file c2ce06423e.pdf]

## Supporting information

### Ethylene glycol-assisted nanocrystallization of $\text{LiFePO}_4$ for a rechargeable lithium-ion battery cathode

Wenpei Kang, Chenhao Zhao, Rui Liu, Fenfen Xu, and Qiang Shen\*

(Corresponding E-mail: [qshen@sdu.edu.cn](mailto:qshen@sdu.edu.cn))

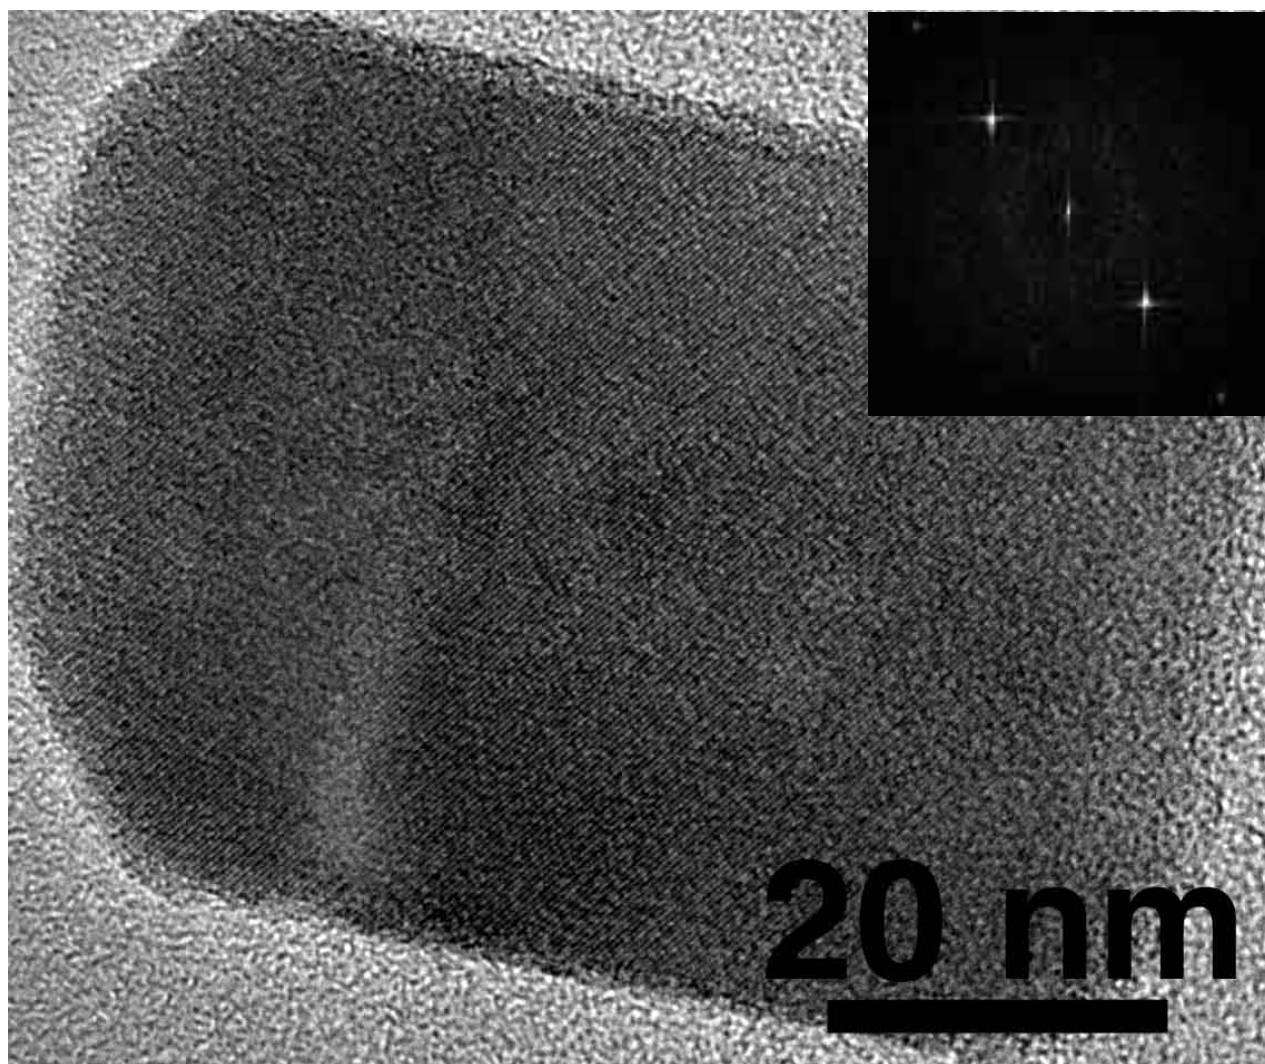

**Fig.S1.** TEM image and inserted FFT pattern of an individual  $\text{LiFePO}_4$  single-crystalline nanoparticle obtained at the solvothermal reaction time of 12 h, showing one-dimensional strip structure.

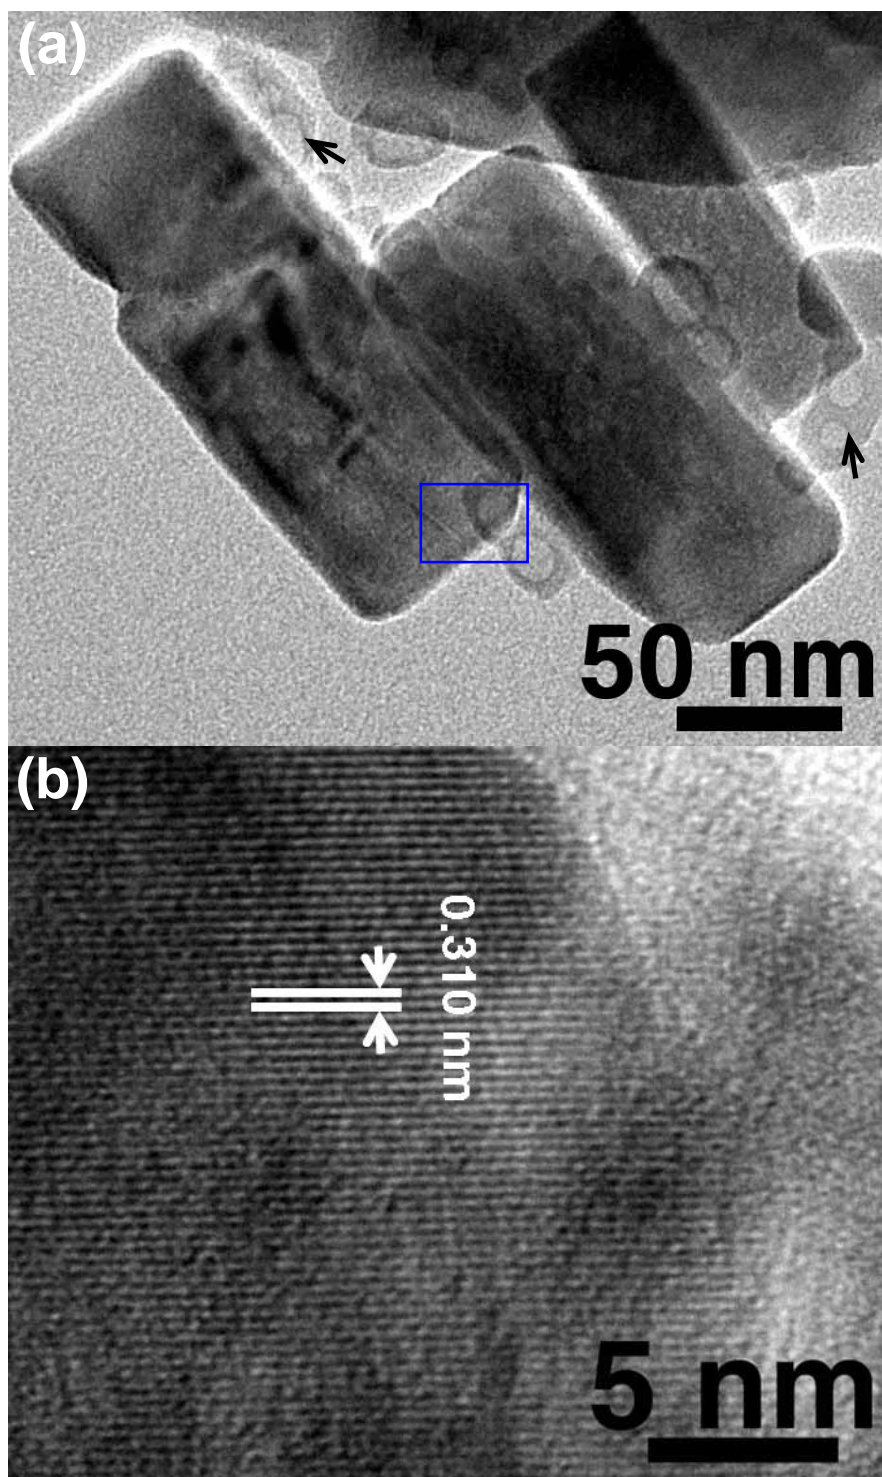

**Fig.S2.** (a) TEM and (b) HR TEM images of  $\text{LiFePO}_4$  nanoparticles fished at the solvothermal reaction time of 12 h. In panel (a), the blue square was magnified and shown in panel (b), while black arrows represent the visually determined residua of amorphous precursors.

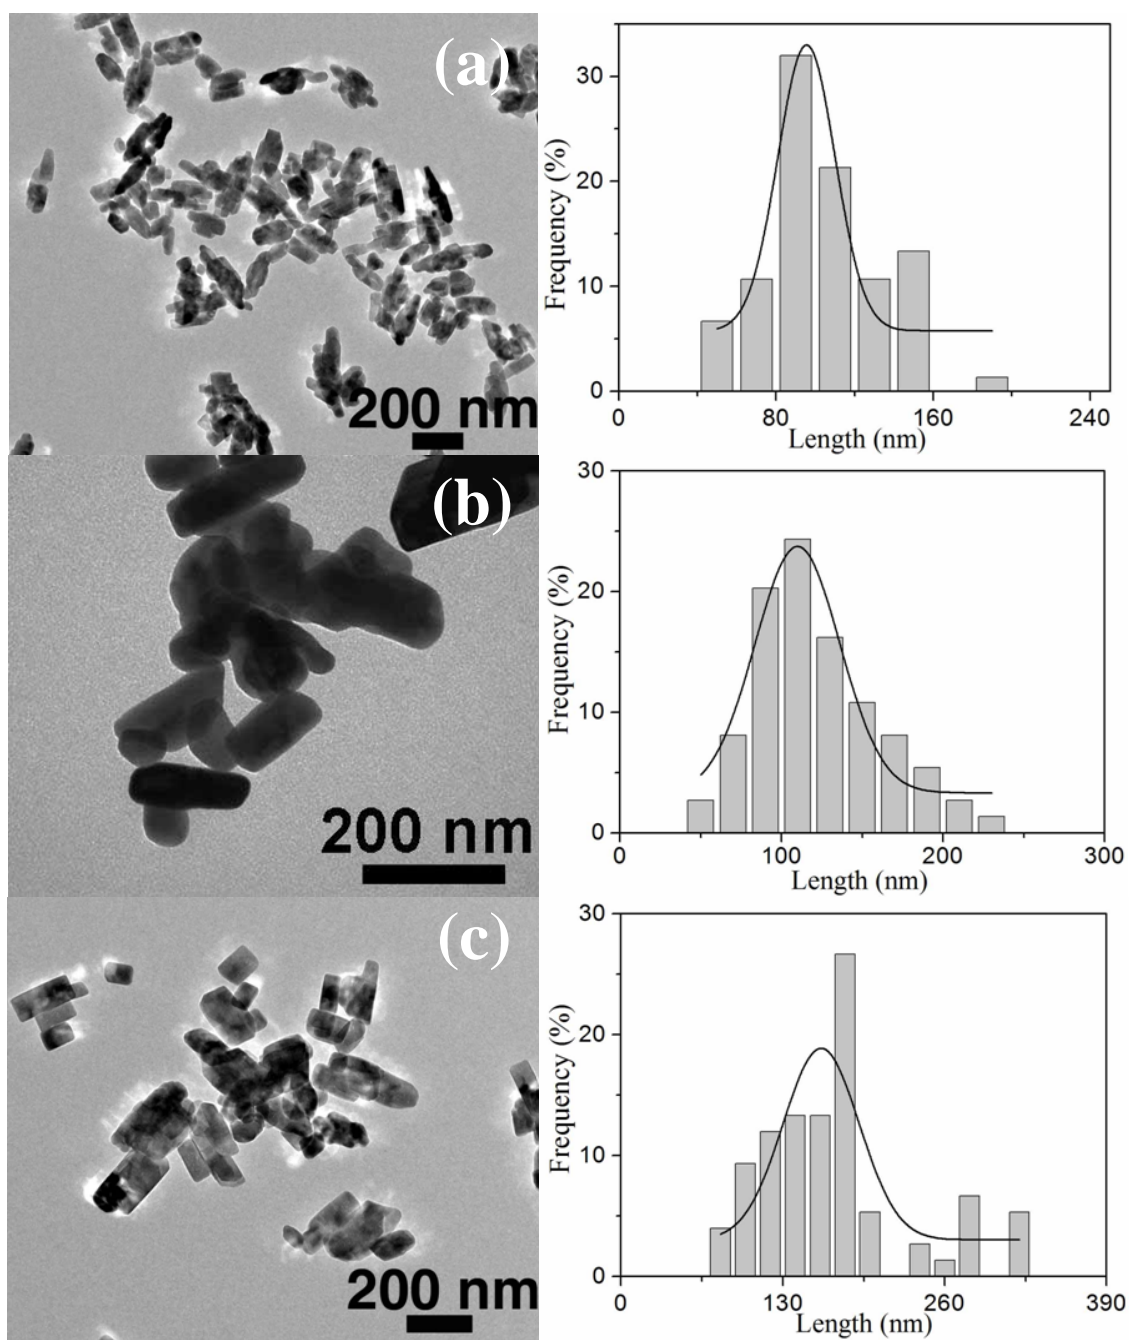

**Fig.S3.** (left) TEM images and (right) size histograms of LiFePO<sub>4</sub> nanoparticles obtained at a solvothermal reaction time of (a) 2, (b) 3, or (c) 12 h.



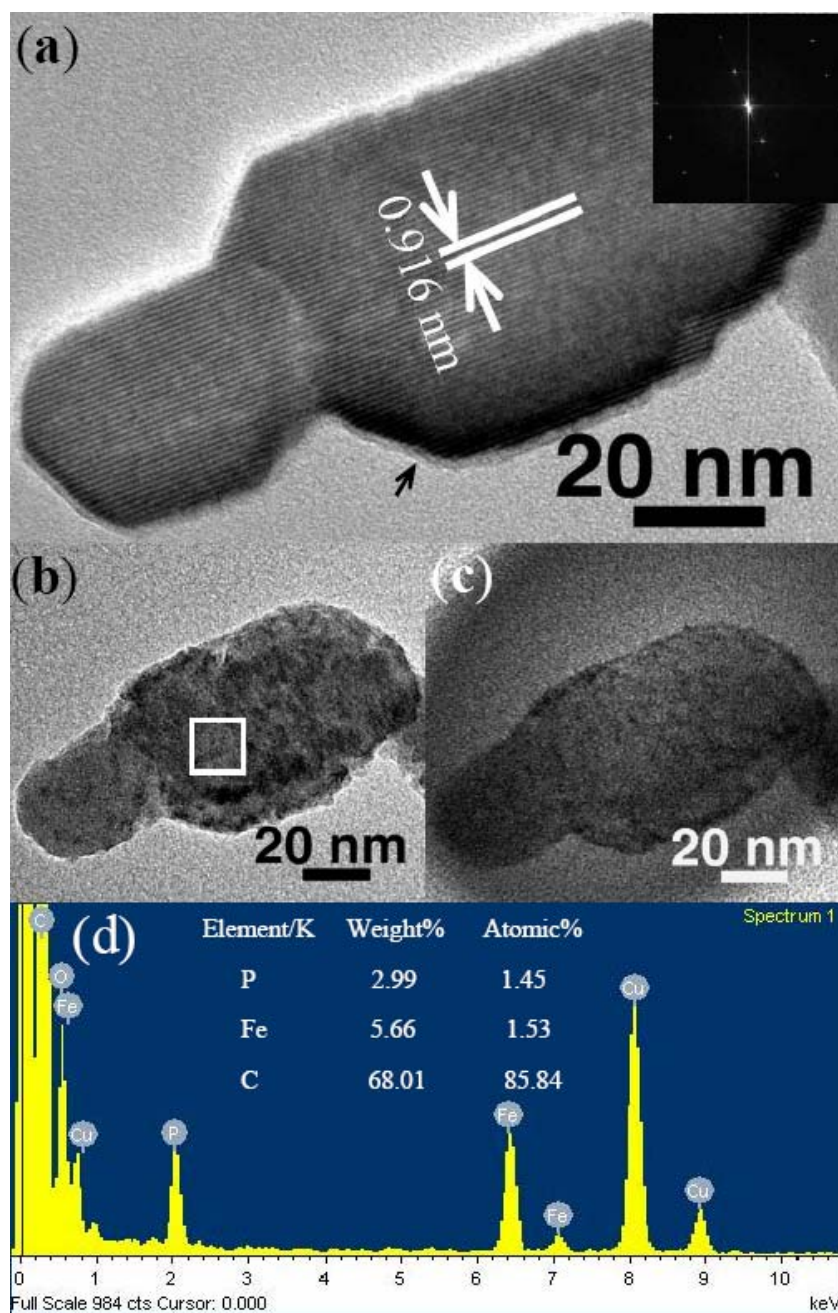

**Fig. S4.** (a) TEM image and inserted FFT pattern of LiFePO<sub>4</sub> nanoparticles obtained at a reaction time of 2 h, showing an arrow-marked amorphous coating and indicating single-crystalline nature. (b, c) TEM images of the LiFePO<sub>4</sub> particle taken after a relatively short- and long-time irradiation of electron beam, respectively, indicating the gradual surface irradiation damage. (e) Energy dispersive spectrum analysis of the square region marked in panel (c) displays the almost equal atomic ratio of Fe/P and the doping of carbon, suggesting that the amorphous coating is the gel-like composite of ethylene glycol and precursors.

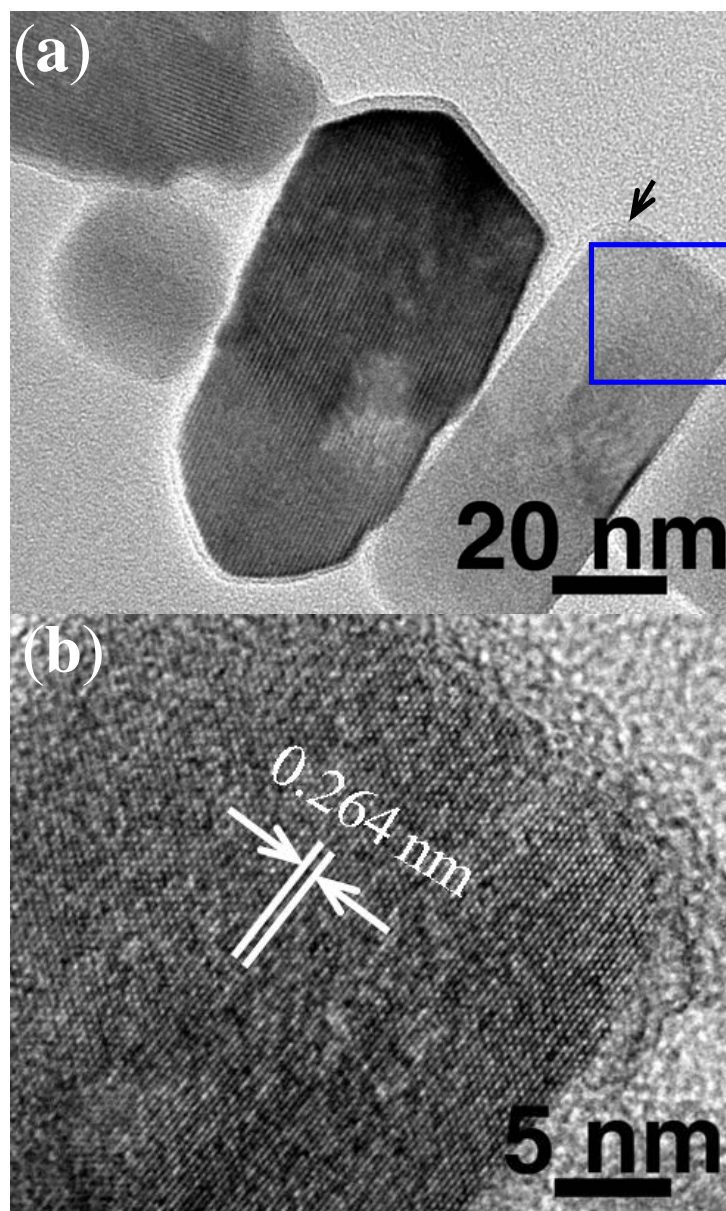

**Fig. S5.** (a) TEM and (b) HRTEM images of  $\text{LiFePO}_4$  nanoparticles obtained at the solvothermal reaction time of 2 h. Panel (b) is the close-up view of an individual nanorod marked in panel (a), indicating the single-crystalline nature of  $\text{LiFePO}_4$ . An arrow marked in panel (a) denotes the amorphous coating of gel-like composite of ethylene glycol and precursor.

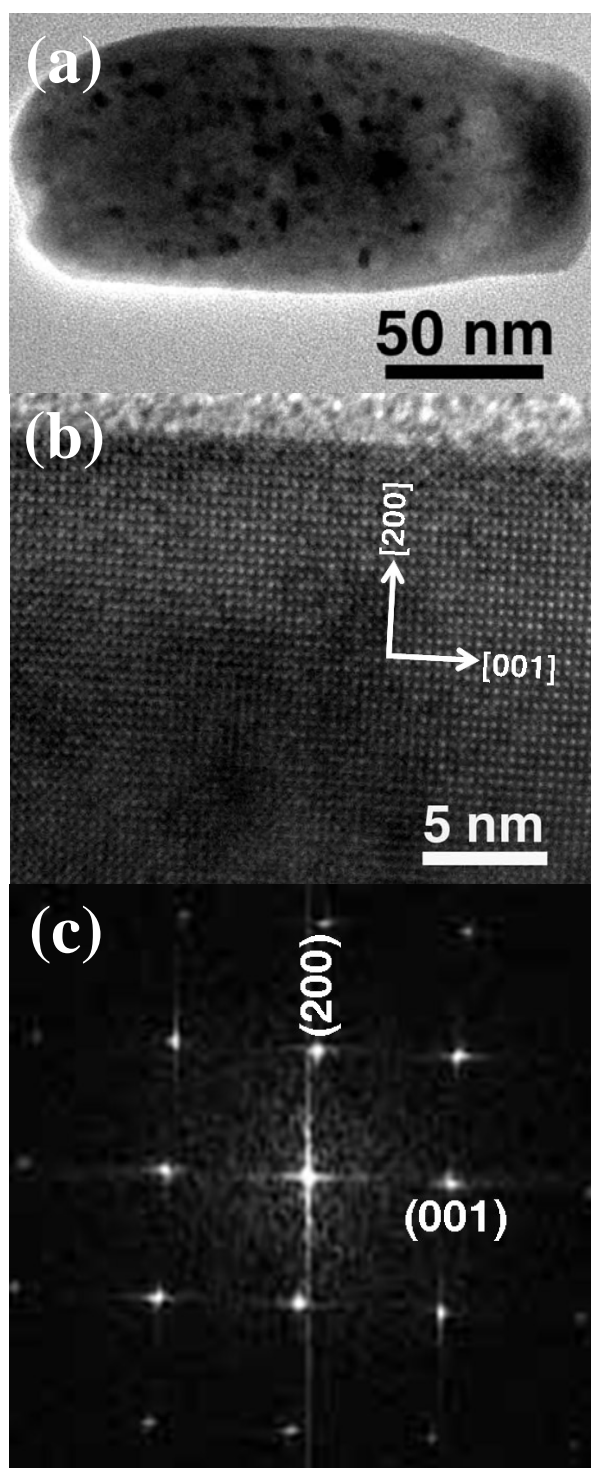

**Fig. S6.** (a) TEM, (b) HR TEM images and (c) FFT pattern of a representative  $\text{LiFePO}_4$  nanoparticle obtained after the decomposition of glucose at  $700^\circ\text{C}$  under argon atmosphere, showing the single-crystalline nature of  $\text{LiFePO}_4$ .



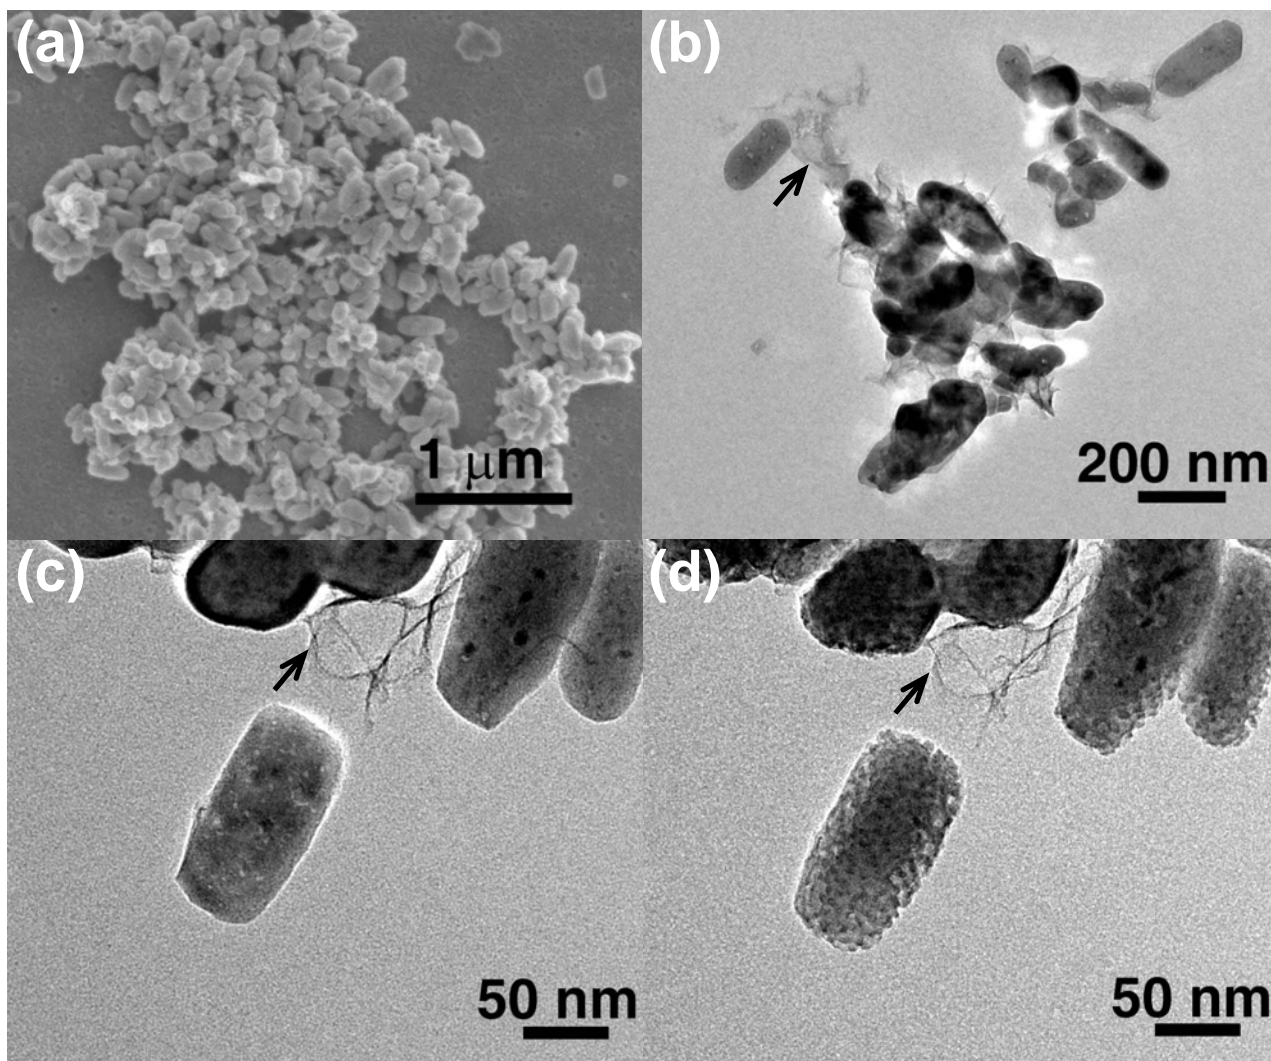

**Fig. S7.** (a) SEM and (b-d) TEM images of LiFePO<sub>4</sub> nanoparticles heat-treated at 700°C under argon atmosphere through the chemical decomposition of glucose. Panel (d) presents the same nanoparticles as these shown in panel (c), which was taken after a short-time irradiation of electron beam. Black arrows denote the ex-situ carbons after glucose decomposition.

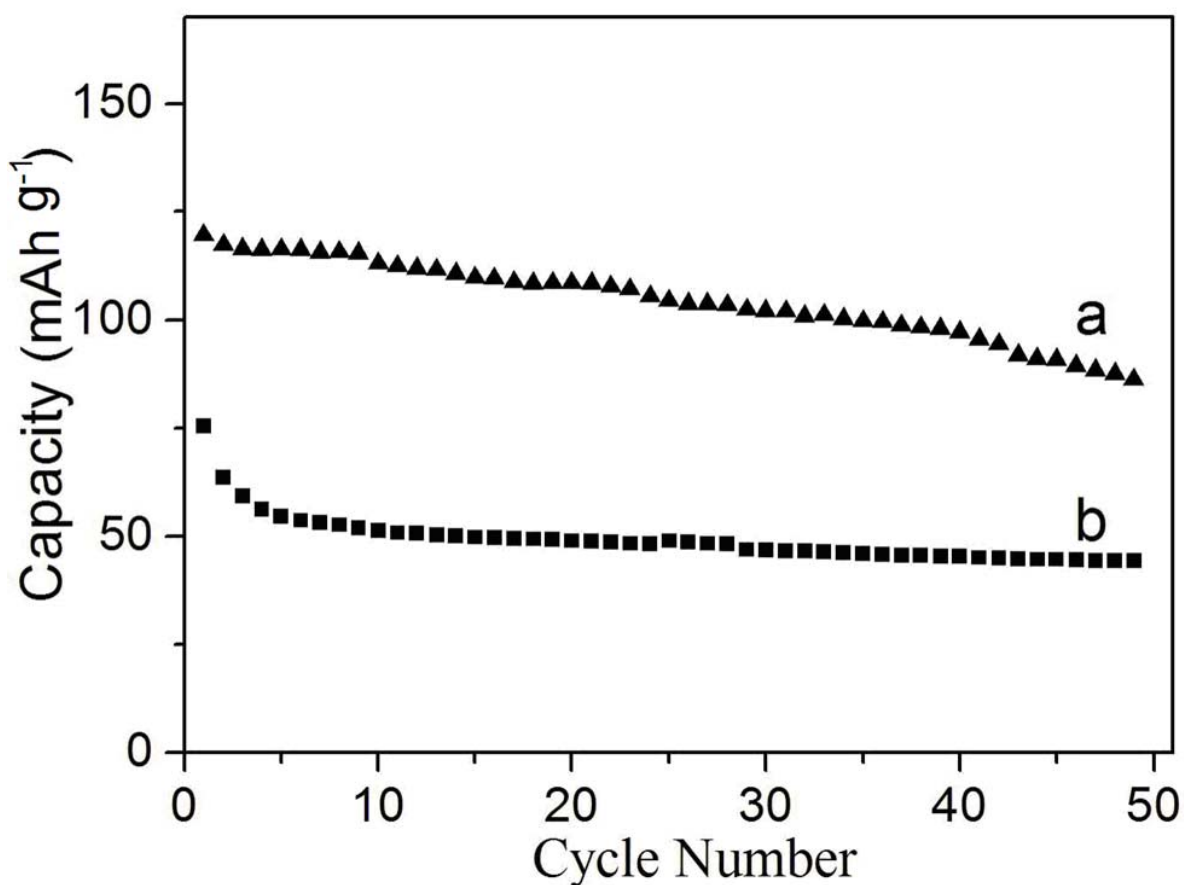

**Fig. S8.** A relationship of special discharge capacity versus cycle number for different LiFePO<sub>4</sub> cathodes (current = 0.2 C): (a) glucose-assisted heat-treated LiFePO<sub>4</sub> single-crystalline nanoparticles obtained at the solvothermal reaction time of 2 h, showing an initial capacity of 119.7 mAh g<sup>-1</sup> and a capacity retention rate of 72.1% over 50 charge-discharge cycles; (b) LiFePO<sub>4</sub> nanoparticles collected at the solvothermal reaction time of 12 h without the subsequent 700°C heat-treatment, showing the initial and 50<sup>th</sup> discharge capacities of 75.6 and 44.3 mAh g<sup>-1</sup>, respectively. These indicate that, for this novel crystal-forming engineering, both the ethylene glycol-assisted solvothermal reaction time (12 h) and the glucose-assisted heat-treatment at 700°C play an important role in improving the electrochemical performances of LiFePO<sub>4</sub> as lithium-ion battery cathodes.
